# Supplementary material for: Id1 Stabilizes Epiblast Identity by Sensing Delays in Nodal Activation and Adjusting the Timing of Differentiation
Source: PubMed Central journal article supplement (PMC6706657; doi:10.1016/j.devcel.2019.05.032), 2019-08-19
Supplement: mmc1.pdf [file mmc1.pdf]

**Developmental Cell, Volume 50**

**Supplemental Information**

**Id1 Stabilizes Epiblast Identity by Sensing  
Delays in Nodal Activation and Adjusting  
the Timing of Differentiation**

**Mattias Malaguti, Rosa Portero Migueles, Guillaume Blin, Chia-Yi Lin, and Sally Lowell**

**FIGURE S1**

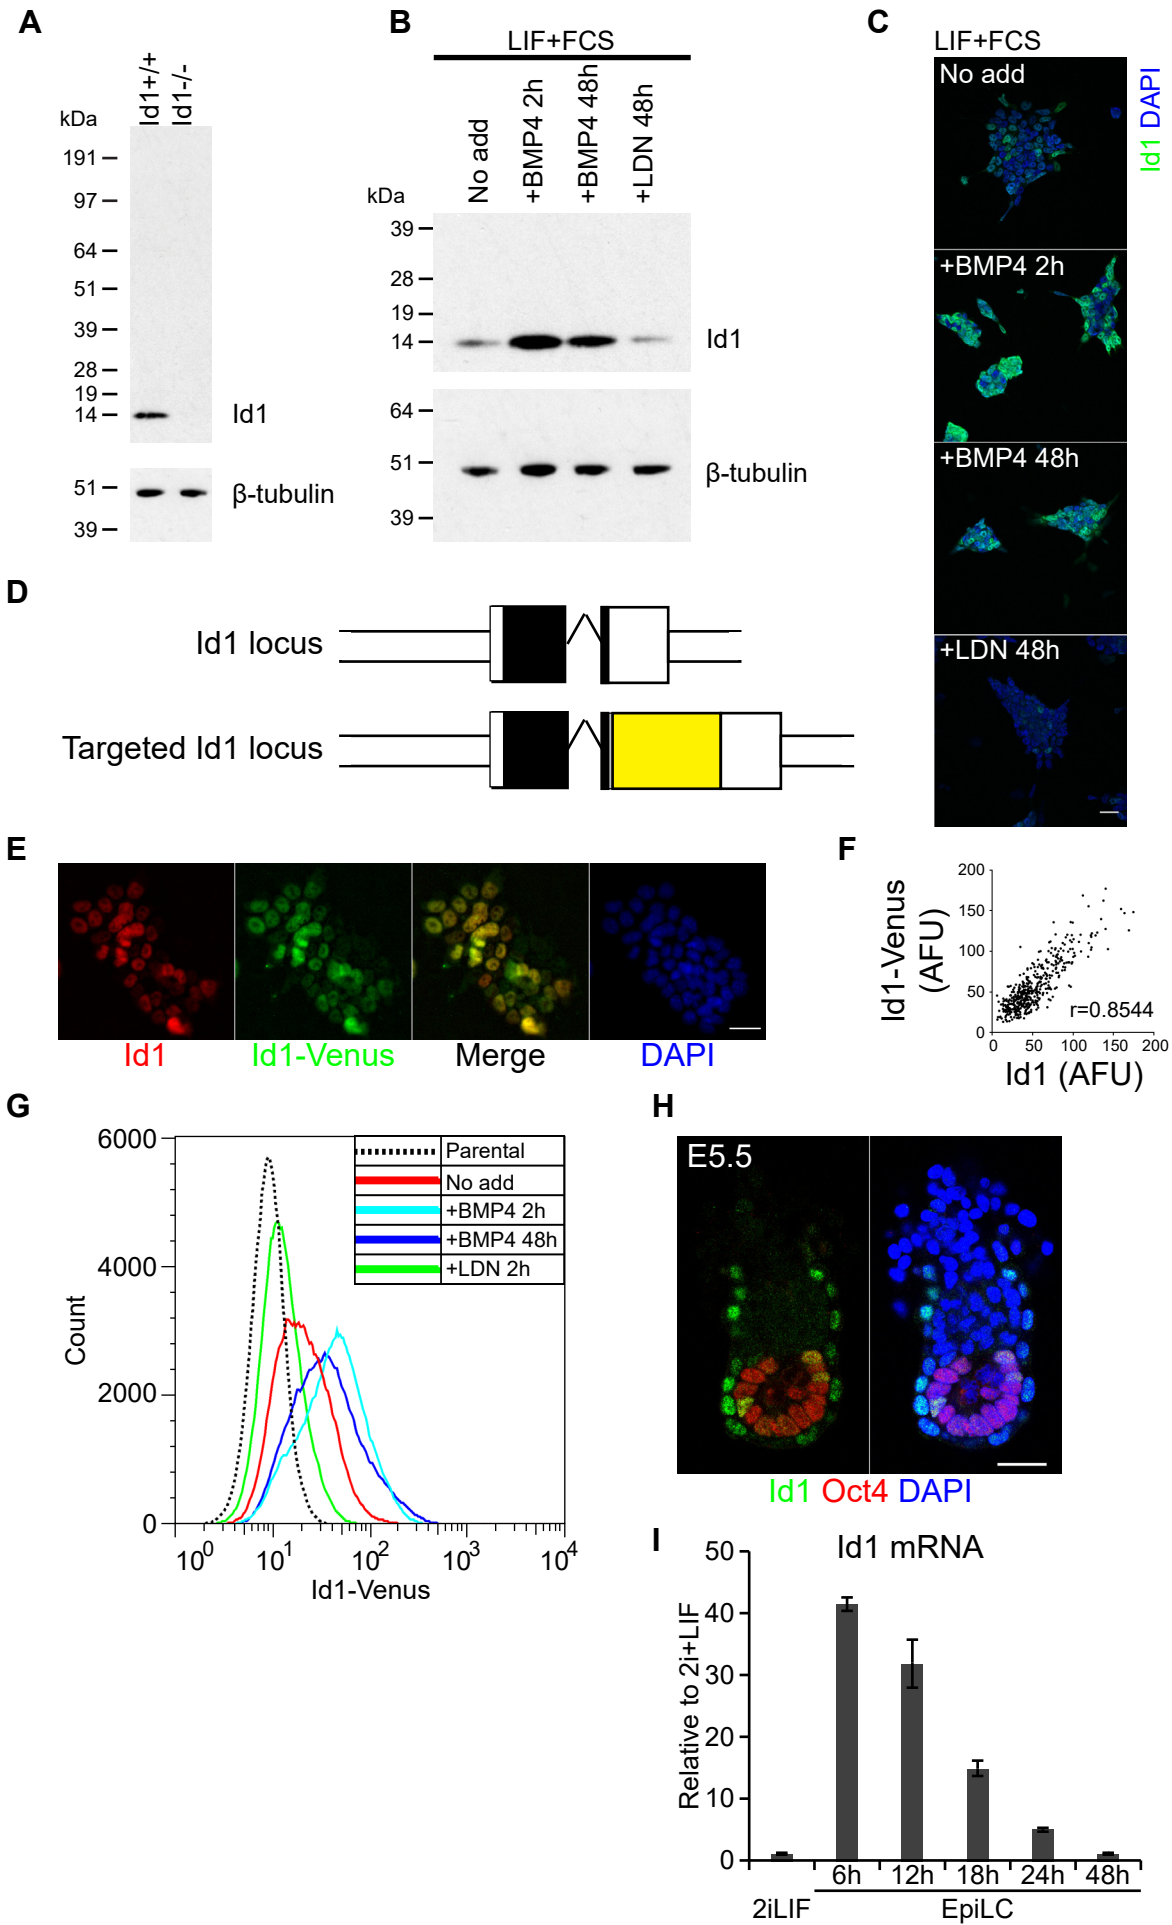

**Figure S1. Id1 immunodetection and the Id1-Venus reporter both provide faithful readouts of BMP responsiveness, Related to Figure 1.**

(A) Western blot for Id1 in wild-type and Id1-null ES cells illustrates the high specificity of the Id1 antibody. B-tubulin is included as a loading control.

(B) Western blot for Id1 in wild-type ES cells cultured in LIF+FCS +/- 10ng/ml BMP4 for 2h or 48h, or with the addition of 100nM of the BMP inhibitor LDN193189 (LDN) for 48h. As expected, Id1 is upregulated upon BMP4 stimulation and downregulated upon BMP inhibition with LDN. B-tubulin is included as a loading control.

(C) Immunofluorescence staining of wild-type ES cells cultured in LIF+FCS with no addition, with the addition of 10ng/ml BMP4 for 2h or 48h, or with the addition of 100nM of the BMP inhibitor LDN193189 (LDN) for 48h. As expected, Id1 is upregulated upon BMP4 stimulation and downregulated upon BMP inhibition with LDN. Scale bar: 30µm.

(D) Diagrammatic structure of the Id1 loci in Id1-Venus reporter ES cells. Venus is fused to the C-terminus of Id1 via a flexible linker.

(E) Co-staining for Id1 and Venus in Id1-Venus cells cultured in LIF+FCS. Scale bar: 30µm.

(F) Immunofluorescence quantification of the cells in (E) show high correlation between Id1 and Venus expression (Pearson's  $r=0.8544$ ). A.F.U.: arbitrary fluorescence units.

(G) Flow cytometry analysis of Id1-Venus cells cultured in LIF+FCS with no addition, with the addition of 10ng/ml BMP4 for 2h or 48h, or with the addition of 100nM of the BMP inhibitor LDN193189 (LDN). Parental non-fluorescent cells are included as a control. As expected, Id1-Venus is upregulated upon BMP4 stimulation and downregulated upon BMP inhibition with LDN.

(H) Co-staining for Id1 and Oct4 in E5.5 mouse embryo. Id1 is co-expressed with Oct4 in a subset of cells in the proximal region of the epiblast, and is expressed in the visceral endoderm.

(I) qRT-PCR for *Id1* in 2i+LIF to EpiLC differentiation of E14Ju09 ES cells. Error bars: standard deviation of 3 biological replicates.

**FIGURE S2 - Malaguti et al**

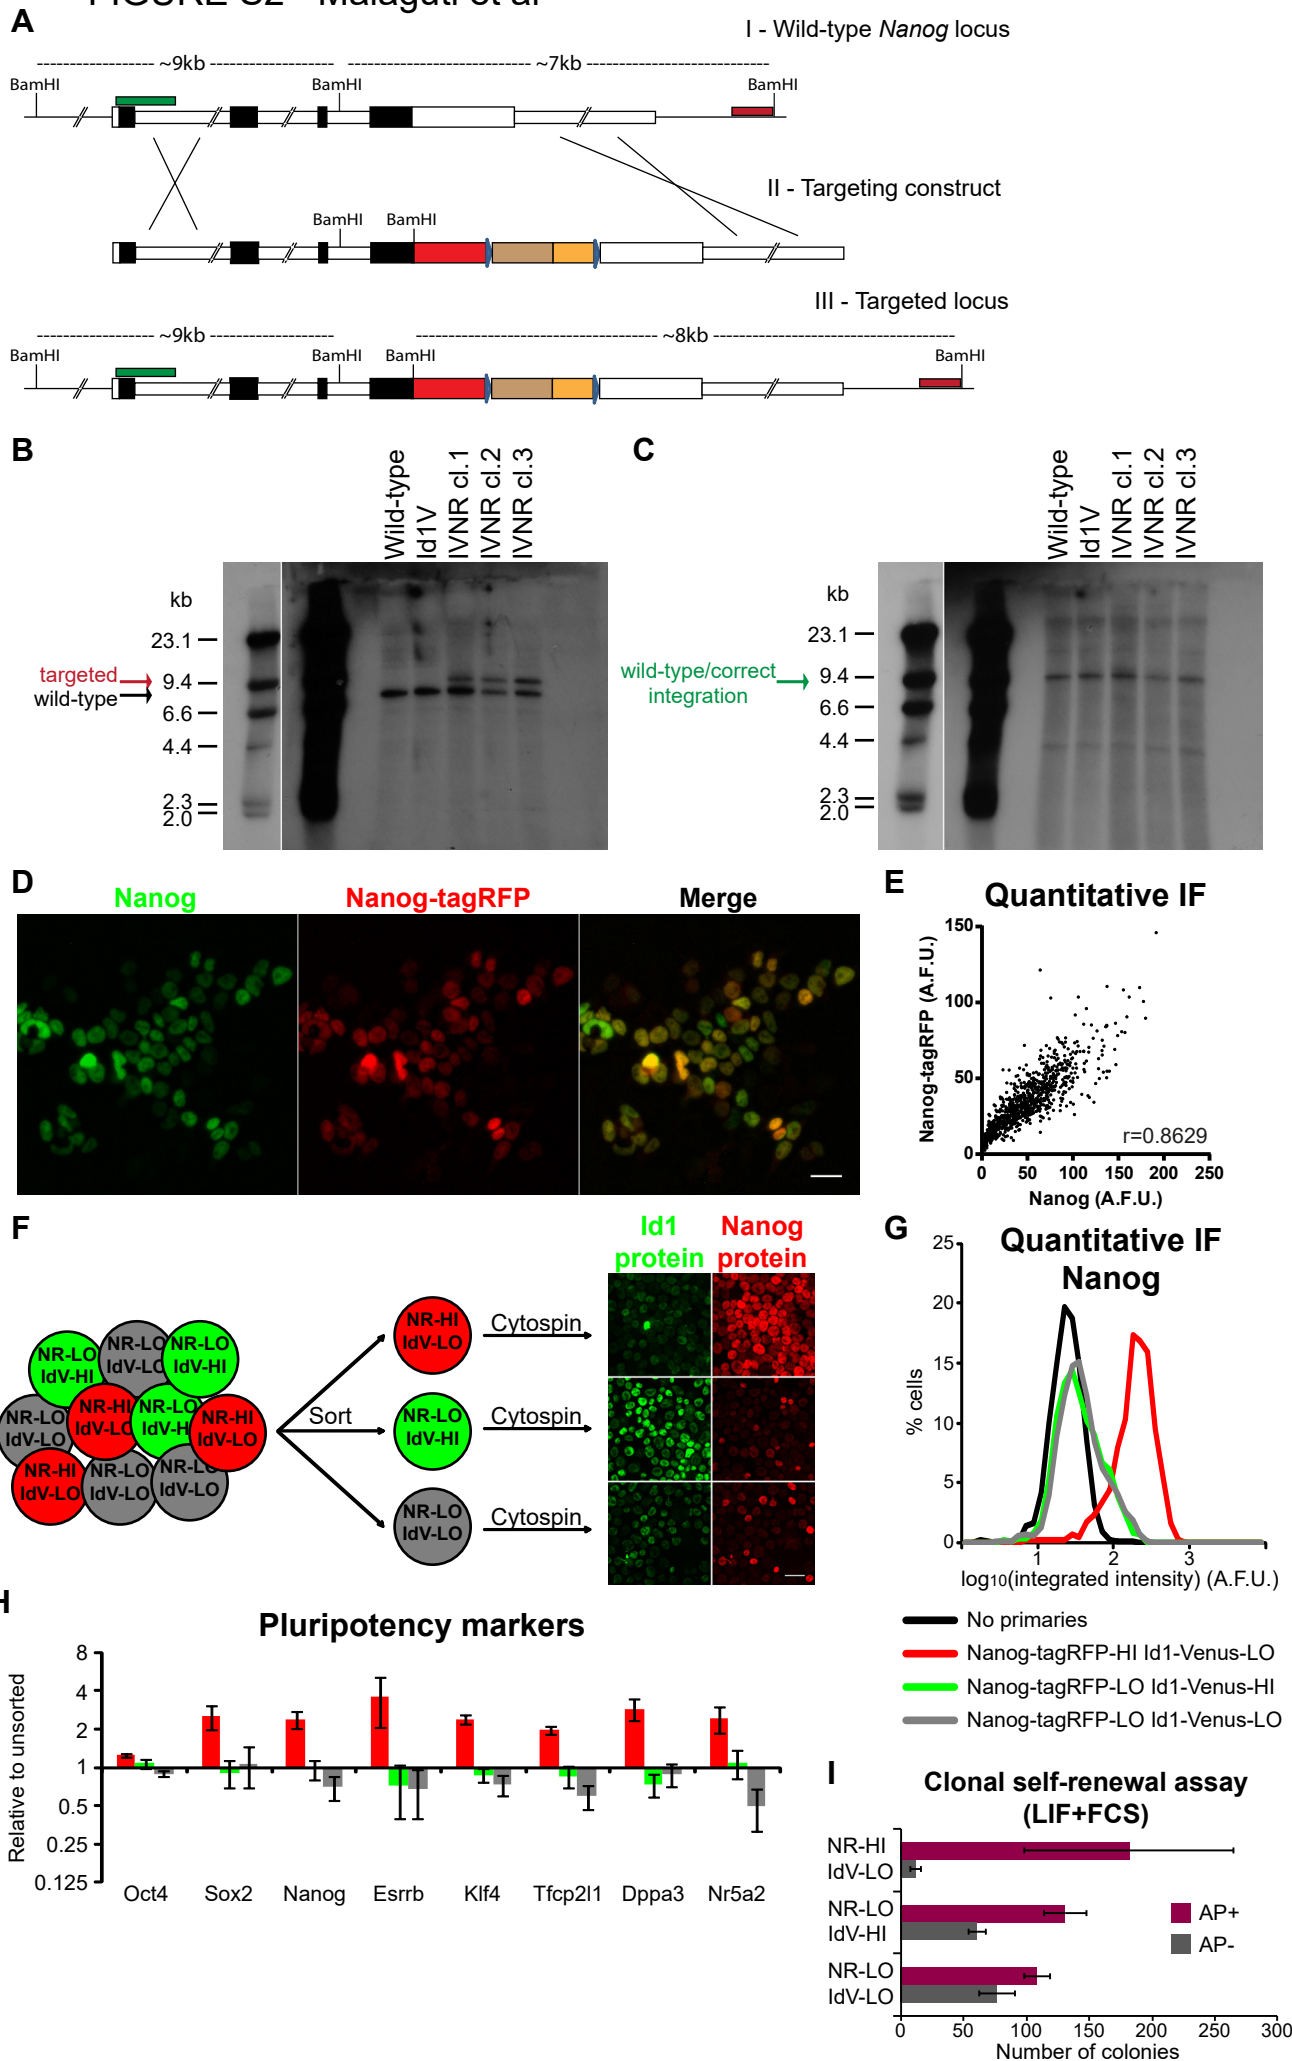

**Figure S2. Characterisation of Id1-Venus Nanog-tagRFP reporter ES cells and their sorted subpopulations, Related to Figure 2.**

(A) Strategy to target the Nanog locus with a *Nanog-tagRFP* fusion construct. Black boxes: exonic DNA, large white boxes: UTRs, medium white boxes: intronic DNA, single black line: intergenic DNA, large red box: *tagRFP*, brown box: *IRE5*, yellow box: *Bls* resistance gene, blue triangles: *loxP* sites, medium red box: Southern blot targeting probe, medium green box: Southern blot multiple integration probe. Sizes of expected bands following BamHI restriction digest are indicated.

(B) Southern blot with targeting probe on BamHI-digested genomic DNA extracted from wild-type ES cells, Id1-Venus parental cells (Id1V) and three different Id1-Venus Nanog-tagRFP (IVNR) clones. All three clones present the expected banding pattern for correctly targeted clones. A lower exposure of the  $\lambda$  DNA-HindIII digest ladder is included to the left of the blot.

(C) Southern blot with multiple integration probe on BamHI-digested genomic DNA extracted from wild-type ES cells, Id1-Venus parental cells (Id1V) and three different Id1-Venus Nanog-tagRFP (IVNR) clones. All three clones present the expected banding pattern for correctly targeted clones. A lower exposure of the  $\lambda$  DNA-HindIII digest ladder is included to the left of the blot.

(D) Co-staining for Nanog and tagRFP in IVNR cells cultured in LIF+FCS. Scale bar: 30 $\mu$ m.

(E) Immunofluorescence quantification of the cells in (D) show high correlation between Nanog and tagRFP expression (Pearson's  $r=0.8629$ ). A.F.U.: arbitrary fluorescence units.

(F) Sorting of IVNR ES cells cultured in LIF+FCS into 3 subpopulations based on Id1-Venus and Nanog-tagRFP expression: Nanog-tagRFP-high Id1-Venus-low (NR-HI IdV-LO), Nanog-tagRFP-low Id1-Venus-high (NR-LO IdV-HI) and Nanog-tagRFP-low Id1-Venus-low (NR-LO IdV-LO). Cytospin of the three subpopulations was performed immediately after sorting, and cells were stained for Id1 and Nanog expression. Scale bar: 30 $\mu$ m.

(G) Immunostaining quantification of Nanog expression in the three sorted subpopulations in (F) reveals the presence of similar low numbers of Nanog-medium cells in the two NR-LO subpopulations.

(H) qRT-PCR analysis of the sorted samples in (F) reveal similar levels of pluripotency marker expression between the two NR-LO subpopulations, with the exception of *Nr5a2*, which is higher in NR-LO IdV-HI than NR-LO IdV-LO ES cells. Data are represented as mean  $\pm$  SEM of seven independent experiments.

(I) Clonal self-renewal assays for cells sorted in (F) reveal no significant differences in alkaline phosphatase-positive colony-forming ability between NR-LO IdV-HI and NR-LO IdV-LO cells. 300 cells were plated on 10cm<sup>2</sup> for each sample. Data are represented as mean  $\pm$  SEM of three independent experiments.

# FIGURE S3

## A - LIF+FCS - No significant enrichment in NR-LO IdV-LO vs NR-LO IdV-HI

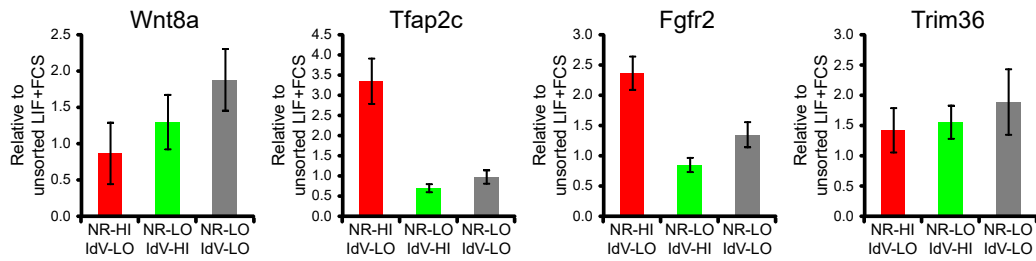

## B - LIF+FCS Nanog<sup>-/-</sup>

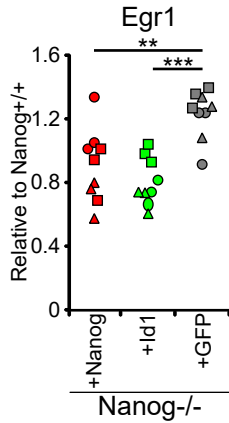

## C - 6h N2B27 - Naïve pluripotency

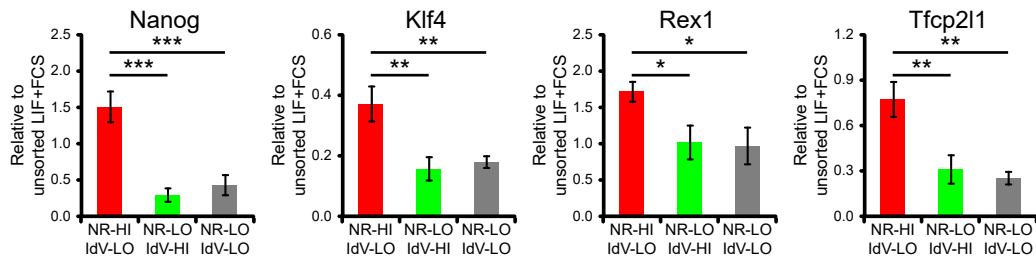

## D - 6h N2B27 - General and primed pluripotency

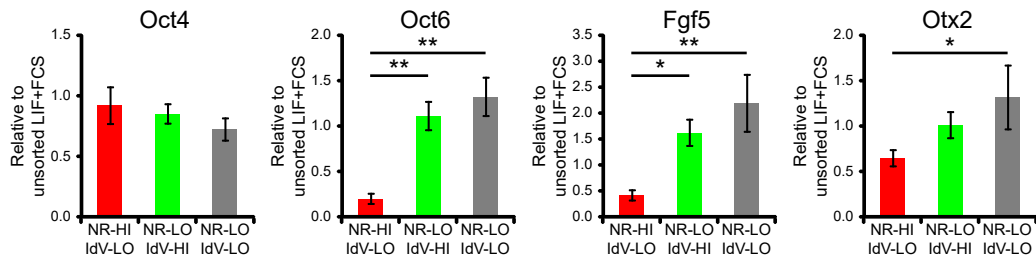

**Figure S3. Comparison of Nanog-low Id1-low and Nanog-low Id1-high cells, Related to Figure 3.**

(A) qRT-PCR experiments showing lack of statistically significant (one-way ANOVA followed by unpaired t-test,  $p < 0.05$ ) differential expression between NR-LO IdV-LO and NR-LO IdV-HI subpopulations for transcripts in Figure 3B. Data are presented as mean  $\pm$  SEM of seven independent experiments. Validation of transcripts that showed statistically significant expression (*Egr1*, *Lefty1*) is shown in Figure 3C.

(B) qRT-PCR analysis for *Egr1* of Nanog-rescue cells cultured in LIF+FCS. Each shape represents a different clonal line.

(C) qRT-PCR analysis of naïve pluripotency marker expression in sorted subpopulations after the 6h N2B27 differentiation challenge.

(D) qRT-PCR analysis of general and primed pluripotency marker expression in sorted subpopulations after the 6h N2B27 differentiation challenge.

Data in (C) and (D) are represented as mean  $\pm$  SEM of three independent experiments. Statistical analyses (unless specified): one-way ANOVA followed by Tukey's multiple comparison test. \* $p < 0.05$ , \*\* $p < 0.01$ , \*\*\* $p < 0.001$ .

# FIGURE S4

## A - Transcriptome data

Transcripts enriched in NR-LO IdV-HI vs NR-LO IdV-LO

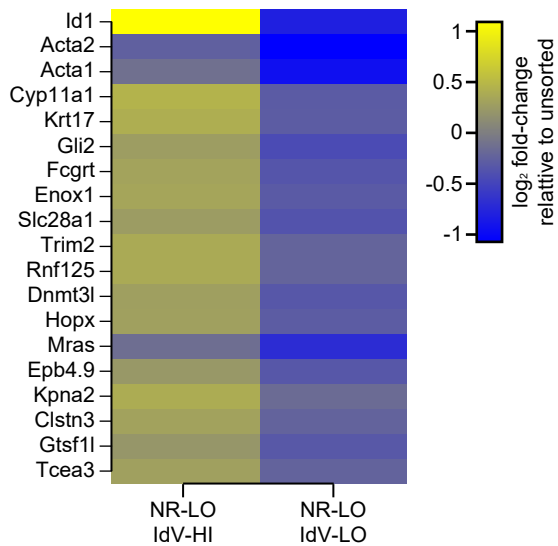

## B - qRT-PCR - Significant enrichment in NR-LO IdV-HI vs NR-LO IdV-LO LIF+FCS

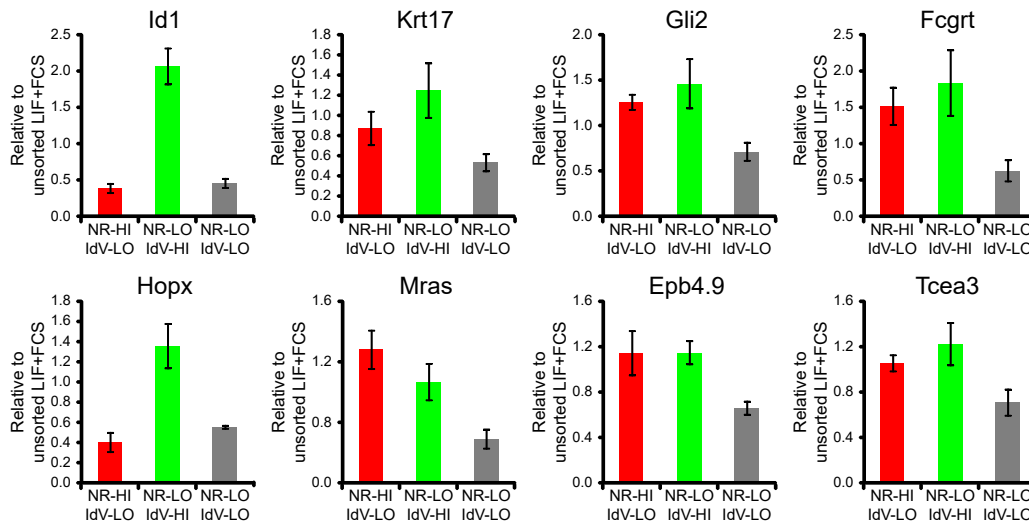

## C - qRT-PCR - No significant enrichment in NR-LO IdV-HI vs NR-LO IdV-LO LIF+FCS

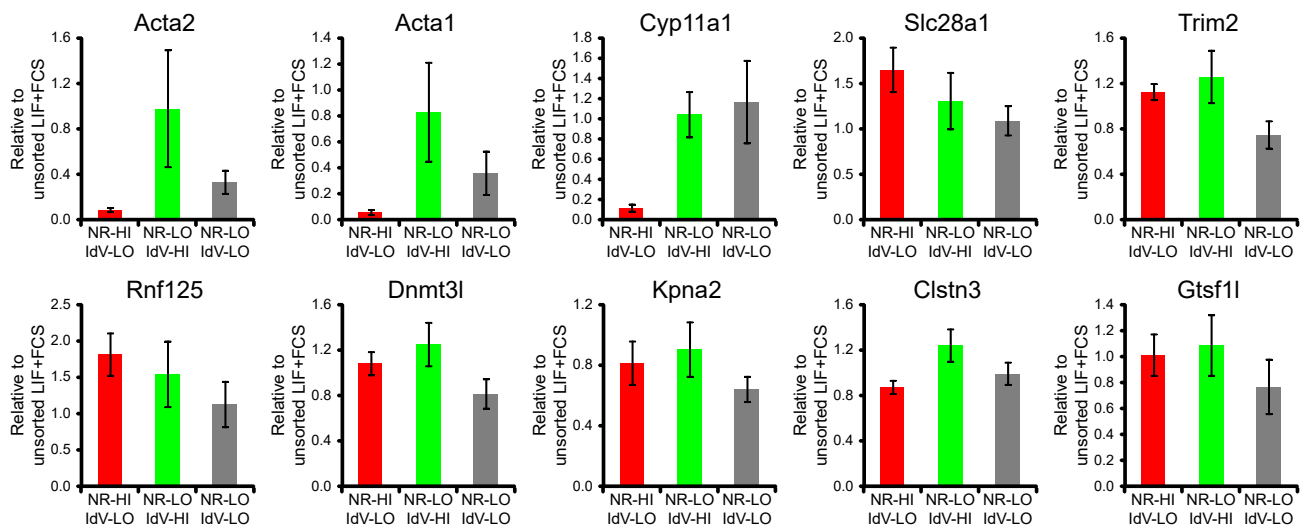



**Figure S4. Transcripts enriched in Nanog-low Id1-high vs Nanog-low Id1-low cells, Related to Figure 4.**

(A) Heatmap of transcripts significantly enriched in NR-LO IdV-HI relative to NR-LO IdV-LO subpopulations. Significance was defined as  $\log_2(\text{fold-change}) > 0.5$ , p-value adjusted for multiple testing correction  $< 0.5$ . Methods for statistical analysis of transcriptomic data are described in the STAR Methods section.

(B) qRT-PCR experiments showing statistically significant (ANOVA followed by unpaired t-test,  $p < 0.05$ ) differential expression between NR-LO IdV-HI and NR-LO IdV-LO subpopulations for transcripts in (A).

(C) qRT-PCR experiments showing lack of statistically significant (ANOVA followed by unpaired t-test,  $p < 0.05$ ) differential expression between NR-LO IdV-HI and NR-LO IdV-LO subpopulations for transcripts in (A).

qRT-PCR data are represented as mean  $\pm$  SEM of seven independent experiments.

# FIGURE S5

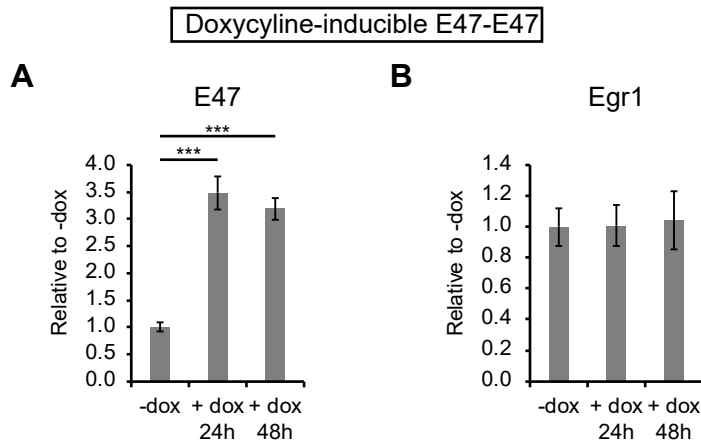

**Figure S5. E47 homodimers do not induce Egr1 expression in ES cells, Related to Figure 5.**

Mouse ES cells harbouring a doxycycline-inducible 3xFlag-E47-E47 transgene were cultured in LIF+FCS for 48h in the absence (“-dox”) or the presence (“+dox”) of 1µg/ml doxycycline (dox) for 24h or 48h. qRT-PCRs were performed to assess the expression of (A) *E47* and (B) *Egr1*. Data are presented as mean ± SEM of six independent experiments.

## FIGURE S6

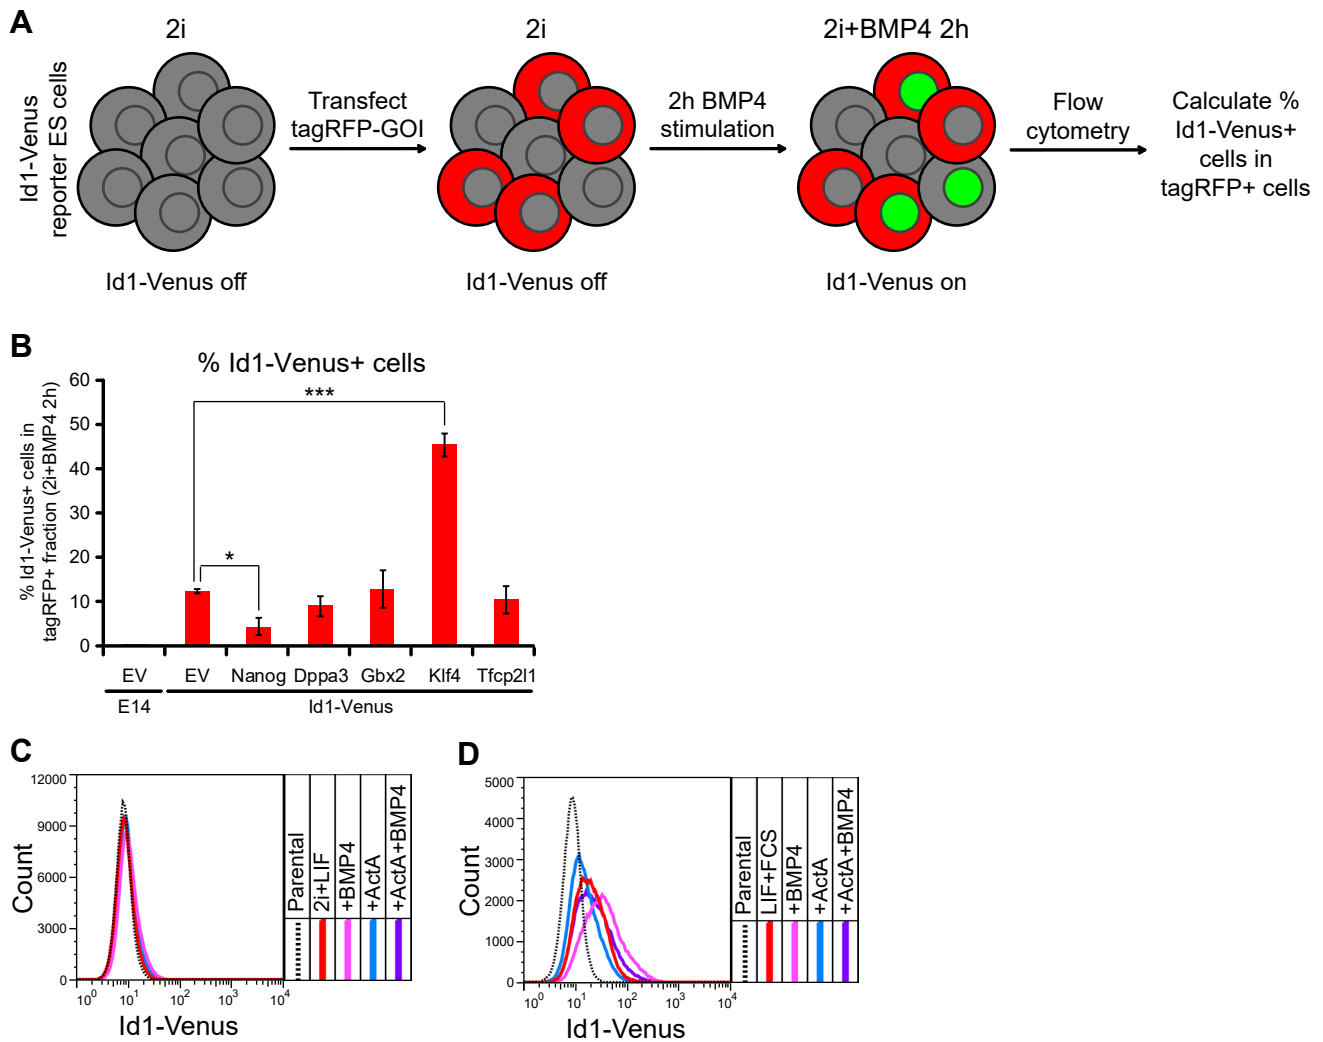

**Figure S6. Nanog and Activin A repress Id1-Venus expression, Related to Figure 6.**

(A) Experimental strategy. Id1-Venus reporter ES cells were cultured in 2i, a condition in which Id1-Venus is not expressed. Overexpression plasmids encoding tagRFP fused to genes of interest were lipofected into the cultures. After 48h, the cells were treated with 10ng/ml BMP4 for 2h to enable Id1-Venus expression (unlike 2i+LIF, Id1 is expressed in response to BMP4 in 2i), then subject to flow cytometry analysis. The percentage of cells upregulating Id1-Venus within the tagRFP-positive compartment was calculated.

(B) Quantification of the experiment described in (A). Five pluripotency transcription factors were tested, and of these only Nanog was able to repress Id1-Venus expression. EV: tagRFP-empty vector.

Data are presented as mean  $\pm$  SEM of three independent experiments. Statistical analyses were performed using a one-way ANOVA, followed by Dunnett's multiple comparison test of all genes of interest with the empty vector control. \* $p < 0.05$ , \*\*\* $p < 0.001$ .

(C) Flow cytometry analysis of Id1-Venus ES cells cultured in 2i+LIF with or without 48h stimulation with 10ng/ml BMP4 and/or 20ng/ml Activin A.

(D) Flow cytometry analysis of Id1-Venus ES cells cultured in LIF+FCS with or without 48h stimulation with 10ng/ml BMP4 and/or 20ng/ml Activin A.

FIGURE S7

**A**

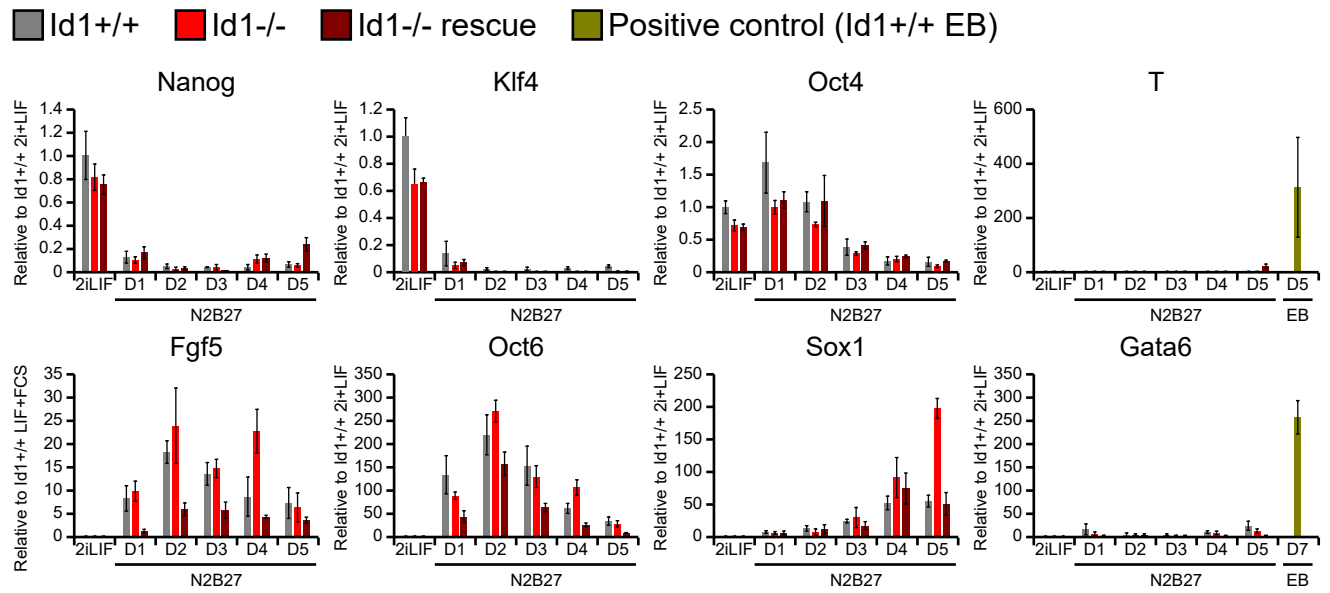

**B**

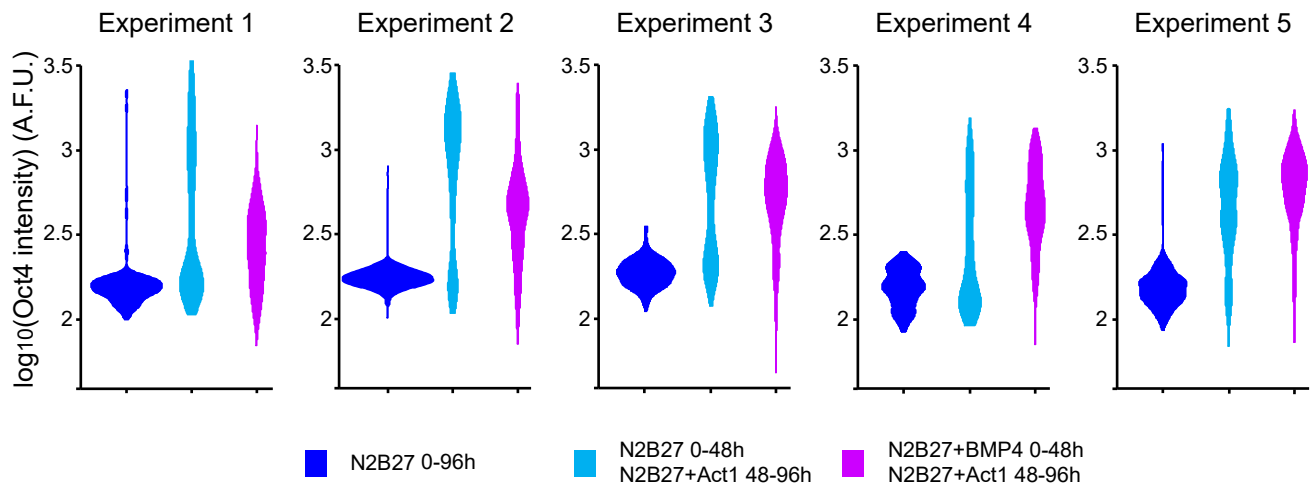

**C**

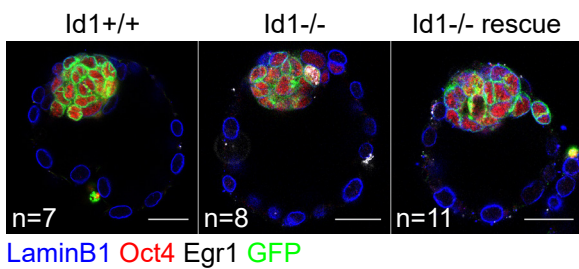

**D**

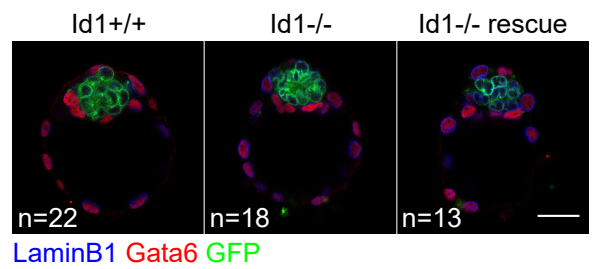

**E**

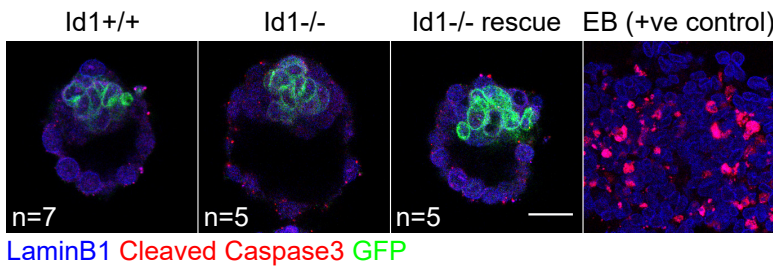

**Fig S7. Id1 enables a robust transition from naïve to primed pluripotency in the face of conflicting signals, Related to Figure 7.**

(A) qRT-PCR of wild-type, Id1-null and Id1-rescue ES cells undergoing 2i+LIF --> N2B27 differentiation. All cell lines are able to exit pluripotency, with Id1-null cells displaying a pro-neural phenotype. Positive control samples from wild-type embryoid bodies (EB) are included for *T* and *Gata6*. Data are presented as mean  $\pm$  standard deviation of at least three biological replicates.

(B) Distribution of Oct4 expression in 5 replicate experiments described in Figure 7A-D. Experiment 3 is also shown in Figure 7C. Act1: 1ng/ml Activin A. A.F.U.: Arbitrary fluorescence units.

(C) Representative images of Id1<sup>+/+</sup>, Id1<sup>-/-</sup> and Id1<sup>-/-</sup> rescue chimaeras, cultured to the blastocyst stage and stained for LaminB1, GFP, Oct4 and Egr1. Egr1 expression was detected in a single cell of an Id1<sup>-/-</sup> chimaera (shown in Figure) across all stained blastocysts. Scale bars: 30 $\mu$ m.

(D) Representative images of Id1<sup>+/+</sup>, Id1<sup>-/-</sup> and Id1<sup>-/-</sup> rescue chimaeras, cultured to the blastocyst stage and stained for LaminB1, GFP and Gata6. Scale bar: 30 $\mu$ m.

(E) Representative images of Id1<sup>+/+</sup>, Id1<sup>-/-</sup> and Id1<sup>-/-</sup> rescue chimaeras, cultured to the blastocyst stage and stained for LaminB1, GFP and Cleaved Caspase3. An embryoid body (EB) section is included as a positive control. Scale bar: 30 $\mu$ m.

**Table S2. List of primers used in this study, Related to STAR Methods.**

| <i>qRT-PCR primer sequences</i> |                             |                    |
|---------------------------------|-----------------------------|--------------------|
| <b>Description</b>              | <b>Sequence</b>             | <b>UPL Probe #</b> |
| Acta1 Forward                   | TGAAGCCTCACTTCCTACCC        | 81                 |
| Acta1 Reverse                   | CGTCGCACATGGTGTCTAGT        | 81                 |
| Acta2 Forward                   | CTCTCTTCCAGCCATCTTTCAT      | 58                 |
| Acta2 Reverse                   | TATAGGTGGTTTCGTGGATGC       | 58                 |
| Clstn3 Forward                  | TTGAGAGTGCTCGTCCTGTC        | 6                  |
| Clstn3 Reverse                  | GCCATTCATCATCACACACC        | 6                  |
| Cyp11a1 Forward                 | AAGTATGGCCCCATTTACAGG       | 104                |
| Cyp11a1 Reverse                 | TGGGGTCCACGATGTAAACT        | 104                |
| Dnmt3l Forward                  | AACCGACGGAGCATTGAA          | 34                 |
| Dnmt3l Reverse                  | AAACAAGGGGTGCCGAGT          | 34                 |
| Dppa3 Forward                   | GATAGGATGCACAACGATCCA       | 73                 |
| Dppa3 Reverse                   | AAAAATGCTTTTATTACAAATTTCTGG | 73                 |
| E47 Forward                     | GTGGGCTCTGACAAGGAACT        | 79                 |
| E47 Reverse                     | ACAGGTAGCGGGAACATCAT        | 79                 |
| Epb4.9 Forward                  | TCATGATCTATGAGCCCCACT       | 79                 |
| Epb4.9 Reverse                  | GTGGATTTGGGTGACAGTGA        | 79                 |
| Egr1 Forward                    | CCTATGAGCACCTGACCACA        | 22                 |
| Egr1 Reverse                    | TCGTTTGGCTGGGATAACTC        | 22                 |
| Egr2 Forward                    | CTACCCGGTGGAAAGACCTC        | 60                 |
| Egr2 Reverse                    | GTCAATGTTGATCATGCCATCT      | 60                 |
| Esrrb Forward                   | CGATTCATGAAATGCCTCAA        | 89                 |
| Esrrb Reverse                   | CCTCCTCGAACTCGGTCA          | 89                 |
| Fcgrt Forward                   | CCTCAAGACCCTGGAGAAGAT       | 40                 |
| Fcgrt Reverse                   | TATCCGAGGCCAGTTCACA         | 40                 |
| Fgf5 Forward                    | AAAACCTGGTGCACCCTAGA        | 29                 |
| Fgf5 Reverse                    | CATCACATTCCCGAATTAAGC       | 29                 |
| Fgfr2 Forward                   | CCTGCGGAGACAGGTAACAG        | 17                 |
| Fgfr2 Reverse                   | CGGGGTGTTGGAGTTCAT          | 17                 |
| Gata4 Forward                   | CCCCTCATTAAGCCTCAGC         | 77                 |
| Gata4 Reverse                   | CACCCTCGGCATTACGAC          | 77                 |
| Gata6 Forward                   | GGTCTCTACAGCAAGATGAATGG     | 40                 |
| Gata6 Reverse                   | TGGCACAGGACAGTCCAAG         | 40                 |
| Gli2 Forward                    | CCAGTGGCTCTTATGGACATC       | 26                 |
| Gli2 Reverse                    | GTAGGCCACAGGATTGATGG        | 26                 |
| Gtsf1l Forward                  | GGCTTTTCCTTTTCGAGGTGT       | 18                 |
| Gtsf1l Reverse                  | TATGGATTCTGGCTCCATCC        | 18                 |
| Hopx Forward                    | ACCACGCTGTGCCTCATC          | 68                 |
| Hopx Reverse                    | GCGCTGCTTAAACCATTCT         | 68                 |
| Id1 Forward                     | TCCTGCAGCATGTAATCGAC        | 78                 |
| Id1 Reverse                     | GGTCCCGACTTCAGACTCC         | 78                 |

|                 |                          |     |
|-----------------|--------------------------|-----|
| Klf4 Forward    | CGGGAAGGGAGAAGACACT      | 62  |
| Klf4 Reverse    | GAGTTCCTCACGCCAACG       | 62  |
| Kpna2 Forward   | CTGCCCCGACTTAACAGGTTTC   | 56  |
| Kpna2 Reverse   | TTAGCTTTCCTGAGTTCCACATT  | 56  |
| Krt17 Forward   | AGGAGCTGGCCTACCTGAA      | 63  |
| Krt17 Reverse   | ACCTGGCCTCTCAGAGCAT      | 63  |
| Lefty1 Forward  | CTCAGTATGTGGCCCTGCTAC    | 76  |
| Lefty1 Reverse  | AACCTGCCTGCCACCTCT       | 76  |
| Lefty2 Forward  | GCCCTCATCGACTCTAGGC      | 97  |
| Lefty2 Reverse  | AGCTGCTGCCAGAAGTTCAC     | 97  |
| Mras Forward    | TGGGCCATCTTGATGTT        | 51  |
| Mras Reverse    | CTGTGCGCATGTATTGTTCC     | 51  |
| Nanog Forward   | CCTCCAGCAGATGCAAGAA      | 25  |
| Nanog Reverse   | GCTTGCACTTCATCCTTTGG     | 25  |
| Nr5a2 Forward   | ATGGGAAGGAAGGGACAATC     | 22  |
| Nr5a2 Reverse   | TTGTTGAACGCGACTTCTGT     | 22  |
| Oct4 Forward    | GTTGGAGAAGGTGGAACCAA     | 95  |
| Oct4 Reverse    | CTCCTTCTGCAGGGCTTTC      | 95  |
| Oct6 Forward    | CTCAAGCCGCTGCTCAAC       | 25  |
| Oct6 Reverse    | CGCGATCTTGTCCAGGTT       | 25  |
| Otx2 Forward    | GACCCGGTACCCAGACATC      | 103 |
| Otx2 Reverse    | GCTCTTCGATTCTTAAACCATACC | 103 |
| Rex1 Forward    | CAGTCTCTGCACACAGAAGA     | 16  |
| Rex1 Reverse    | ACTGATCCGCAAACACCTG      | 16  |
| Rnf125 Forward  | GAGGACTGAGATTTAAGGTGGTG  | 103 |
| Rnf125 Reverse  | GCAAGATCGGCAGAACCA       | 103 |
| Sdha Forward    | CAGTTCACCCCACAGGTA       | 71  |
| Sdha Reverse    | TCTCCACGACACCCTTCTGT     | 71  |
| Slc28a1 Forward | GCTGTTTTGAGTGGATCAGCA    | 108 |
| Slc28a1 Reverse | GACGATCAAGAAGCCGATGT     | 108 |
| Sox1 Forward    | GTGACATCTGCCCCATC        | 60  |
| Sox1 Reverse    | GAGGCCAGTCTGGTGTGTCAG    | 60  |
| Sox2 Forward    | GTGTTTGCAAAAAGGGAAAAGT   | 34  |
| Sox2 Reverse    | TCTTTCTCCCAGCCCTAGTCT    | 34  |
| Sox17 Forward   | CACAACGCAGAGCTAAGCAA     | 97  |
| Sox17 Reverse   | CGCTTCTCTGCCAAGGTC       | 97  |
| T Forward       | ACTGGTCTAGCCTCGGAGTG     | 27  |
| T Reverse       | TTGCTCACAGACCAGAGACTG    | 27  |
| Tbp Forward     | GGGGAGCTGTGATGTGAAGT     | 97  |
| Tbp Reverse     | CCAGGAAATAATTCTGGCTCA    | 97  |
| Tcea3 Forward   | AGCTGAACAGTTGCCAGATG     | 42  |
| Tcea3 Reverse   | ACTGCCACTCCGATCCTG       | 42  |
| Tcf15 Forward   | GTGTAAGGACCGGAGGACAA     | 104 |
| Tcf15 Reverse   | GATGGCTAGATGGGTCCTTG     | 104 |
| Tfcp2l1 Forward | GGGGACTACTCGGAGCATCT     | 53  |

|                 |                       |    |
|-----------------|-----------------------|----|
| Tfcp2l1 Reverse | TTCCGATCAGCTCCCTTG    | 53 |
| Tfap2c Forward  | CGCGGAAGAGTATGTTGTTG  | 62 |
| Tfap2c Reverse  | CGATCTTGATGGAGAAGGTCA | 62 |
| Trim2 Forward   | GTGGACTCAAATGGGAACATC | 5  |
| Trim2 Reverse   | TGATCCACTCCCATCAAAAAC | 5  |
| Trim36 Forward  | CACCTCCCCTAGCATGGATA  | 64 |
| Trim36 Reverse  | TCGGGGTCAGTGAATTACG   | 64 |
| Wnt8a Forward   | ACTGCGGCTGTGACGAGT    | 75 |
| Wnt8a Reverse   | CCCGAACTCCACGTTGTC    | 75 |
| Ywhaz Forward   | TTACTTGGCCGAGGTTGCT   | 9  |
| Ywhaz Reverse   | TGCTGTGACTGGTCCACAAT  | 9  |

***Southern blot probe amplification primer sequences***

| <b>Description</b>                       | <b>Sequence</b>            |
|------------------------------------------|----------------------------|
| Nanog targeting probe forward            | AAATTTATTTCTGGGCATGTGGTGAC |
| Nanog targeting probe reverse            | GGATCCAGATTTTCAGGATTGGAGG  |
| Nanog multiple integration probe forward | TTCAGAAATCCCTTCCCTCG       |
| Nanog multiple integration probe reverse | ATGCTAACTGCTTCTGCTGG       |
